# Supplementary material for: Autoimmunity plays a role in the onset of diabetes after 40 years of age
Source: PubMed Central journal article supplement (PMC6946728; doi:10.1007/s00125-019-05016-3), 2019-11-11

ESM Table 1. Associations of type 1 diabetes SNPs/variants with GAD65 antibody positivity in the EPIC-InterAct subcohort.

| SNPs/variants    | N            | OR          | Lower 95% CI | Upper 95% CI |
|------------------|--------------|-------------|--------------|--------------|
| rs11755527       | 12779        | 1.12        | 0.94         | 1.34         |
| rs1264813        | 12692        | 0.89        | 0.66         | 1.19         |
| rs1465788        | 12625        | 1.01        | 0.83         | 1.24         |
| rs17574546       | 12779        | 1.05        | 0.84         | 1.30         |
| rs1893217        | 12693        | 1.10        | 0.87         | 1.39         |
| rs1990760        | 12779        | 1.07        | 0.89         | 1.28         |
| rs2281808        | 12779        | 0.90        | 0.75         | 1.08         |
| rs3129889        | 12715        | 1.24        | 0.86         | 1.78         |
| rs3788013        | 12779        | 1.07        | 0.90         | 1.28         |
| rs3825932        | 12779        | 1.17        | 0.96         | 1.42         |
| rs4948088        | 12755        | 0.86        | 0.56         | 1.31         |
| rs5753037        | 12779        | 1.02        | 0.85         | 1.23         |
| rs689            | 12779        | 1.10        | 0.90         | 1.34         |
| rs7202877        | 12707        | 0.87        | 0.61         | 1.24         |
| rs9388489        | 12779        | 1.17        | 0.98         | 1.40         |
| rs10509540       | 12779        | 0.93        | 0.76         | 1.13         |
| rs11594656       | 12610        | 1.06        | 0.86         | 1.30         |
| rs12708716       | 12584        | 1.05        | 0.81         | 1.38         |
| rs12722495       | 12779        | 1.01        | 0.68         | 1.48         |
| rs2069762        | 12779        | 1.18        | 0.96         | 1.45         |
| rs2292239        | 12580        | 1.12        | 0.93         | 1.34         |
| rs2395029        | 12681        | 0.74        | 0.44         | 1.25         |
| <b>rs2476601</b> | <b>12779</b> | <b>1.47</b> | <b>1.12</b>  | <b>1.92</b>  |
| rs3024505        | 12779        | 1.01        | 0.79         | 1.29         |
| rs3087243        | 12779        | 0.89        | 0.72         | 1.11         |
| rs425105         | 12682        | 0.88        | 0.69         | 1.11         |

|                        |              |             |             |             |
|------------------------|--------------|-------------|-------------|-------------|
| rs4788084              | 12779        | 1.08        | 0.90        | 1.29        |
| rs763361               | 12779        | 1.05        | 0.81        | 1.35        |
| <b>DR3/DR3</b>         | <b>12720</b> | <b>4.07</b> | <b>2.01</b> | <b>8.26</b> |
| <b>DR3/DR4-DQ8</b>     | <b>12742</b> | <b>2.42</b> | <b>1.32</b> | <b>4.43</b> |
| DR3/X                  | 12733        | 1.18        | 0.86        | 1.63        |
| <b>DR4-DQ8/DR4-DQ8</b> | <b>12755</b> | <b>3.93</b> | <b>1.78</b> | <b>8.68</b> |
| DR4-DQ8/X              | 12732        | 0.83        | 0.47        | 1.43        |

Odds ratios (lower and upper 95% CI) are per 1 unit (i.e. risk allele) of each SNP/variant.

Associations are estimated from logistic regression, adjusted for age and sex. Results highlighted in bold font are statistically significant at the 5% level. DR3 refers to HLA-DRB1\*03 and DR4-DQ8 to HLA-DRB1\*04 with DQB1\*03:02.

ESM Table 2. Hazard ratios for incident diabetes comparing GAD65 antibody positive with GAD65 antibody negative groups, only including individuals with complete data on all covariates used in Model 3; the EPIC-InterAct study.

|                                                                   | Model 1 |      |       |       |                    | Model 2 |      |       |       |                    | Model 3 |      |       |       |                    |
|-------------------------------------------------------------------|---------|------|-------|-------|--------------------|---------|------|-------|-------|--------------------|---------|------|-------|-------|--------------------|
|                                                                   | N       | HR   | Lower | Upper | I <sup>2</sup> (%) | N       | HR   | Lower | Upper | I <sup>2</sup> (%) | N       | HR   | Lower | Upper | I <sup>2</sup> (%) |
| GAD65 antibody <sup>+</sup> vs GAD65 antibody <sup>-</sup>        | 12,835  | 2.05 | 1.52  | 2.77  | 38                 | 12,835  | 2.00 | 1.45  | 2.76  | 42                 | 12,835  | 2.19 | 1.56  | 3.07  | 43                 |
| "High" GAD65 antibody <sup>+</sup> vs GAD65 antibody <sup>-</sup> | 12,835  | 2.66 | 1.65  | 4.27  | 57                 | 12,835  | 2.55 | 1.54  | 4.23  | 59                 | 12,835  | 2.73 | 1.58  | 4.70  | 62                 |
| "Low" GAD65 antibody <sup>+</sup> vs GAD65 antibody <sup>-</sup>  |         | 1.54 | 1.05  | 2.27  | 15                 |         | 1.49 | 1.04  | 2.13  | 2                  |         | 1.74 | 1.21  | 2.50  | 3                  |

Model 1: age (as underlying time scale), sex, center; Model 2: age (as underlying time scale), sex, center, physical activity, smoking status, education; Model 3: age (as underlying time scale), sex, center, physical activity, smoking status, education, family history of diabetes. I<sup>2</sup> represents % of variability due to heterogeneity between countries. "High" GAD65 antibody<sup>+</sup> are defined as GAD65 antibody  $\geq 167.5$  U/ml and "Low" GAD65 antibody<sup>+</sup> are defined as GAD65 antibody  $\geq 167.5$  U/ml.

**ESM Table 3. Associations of type 2 diabetes SNPs with GAD65 antibody positivity in the EPIC-InterAct sub-cohort**

|            | <b>N</b> | <b>SUBCOHORT</b> | <b>OR</b> |
|------------|----------|------------------|-----------|
| rs10401969 | 12732    |                  | 1.25      |
| rs10758593 | 12779    |                  | 1.14      |
| rs10830963 | 12779    |                  | 0.94      |
| rs10923931 | 12779    |                  | 1.02      |
| rs11063069 | 12779    |                  | 0.90      |
| rs11257655 | 12779    |                  | 1.02      |
| rs12779790 | 12494    |                  | 1.07      |
| rs12899811 | 12779    |                  | 1.11      |
| rs12970134 | 12779    |                  | 0.82      |
| rs1535500  | 12494    |                  | 0.95      |
| rs163184   | 12779    |                  | 0.99      |
| rs16927668 | 12779    |                  | 0.96      |
| rs17168486 | 12779    |                  | 1.06      |
| rs17301514 | 12779    |                  | 1.36      |
| rs17762454 | 12494    |                  | 0.98      |
| rs2261181  | 12779    |                  | 1.42      |
| rs2334499  | 12779    |                  | 1.07      |
| rs243088   | 12779    |                  | 0.91      |
| rs2943640  | 12779    |                  | 0.86      |
| rs4299828  | 12779    |                  | 0.91      |

|                  |              |             |
|------------------|--------------|-------------|
| rs4402960        | 12779        | 0.94        |
| rs4458523        | 12577        | 0.91        |
| rs459193         | 12779        | 1.01        |
| rs4812829        | 12779        | 1.04        |
| rs4865796        | 12494        | 0.93        |
| rs516946         | 12779        | 0.98        |
| rs6808574        | 12494        | 1.09        |
| rs6975024        | 12494        | 0.83        |
| rs7177055        | 12779        | 0.74        |
| rs7756992        | 12779        | 1.27        |
| rs780094         | 12779        | 0.87        |
| <b>rs7903146</b> | <b>12779</b> | <b>1.10</b> |
| rs8090011        | 12494        | 1.00        |
| rs9936385        | 12779        | 0.93        |
| rs10203174       | 12694        | 0.98        |
| rs10842994       | 12779        | 1.17        |
| rs10886471       | 12261        | 1.09        |
| rs11065756       | 12448        | 0.97        |
| rs1111875        | 12779        | 1.05        |
| rs11717195       | 12779        | 1.03        |
| rs12427353       | 12779        | 0.86        |
| rs12497268       | 12649        | 0.82        |
| rs12571751       | 12779        | 1.07        |
| rs13233731       | 12779        | 1.08        |
| rs13389219       | 12779        | 1.06        |
| rs1359790        | 12779        | 0.95        |
| rs1496653        | 12779        | 1.00        |
| rs1552224        | 12779        | 0.96        |
| rs17106184       | 12425        | 1.05        |
| rs17791513       | 12779        | 1.34        |

|            |       |      |
|------------|-------|------|
| rs17867832 | 12707 | 1.06 |
| rs1801282  | 12708 | 1.00 |
| rs2028299  | 12494 | 0.87 |
| rs2075423  | 12779 | 1.01 |
| rs3802177  | 12779 | 0.98 |
| rs391300   | 12494 | 0.99 |
| rs4502156  | 12779 | 0.94 |
| rs6795735  | 12779 | 1.14 |
| rs6813195  | 12350 | 1.16 |
| rs6819243  | 12761 | 1.53 |
| rs6878122  | 12779 | 1.10 |
| rs7403531  | 12494 | 1.12 |
| rs7569522  | 12779 | 1.01 |
| rs7845219  | 12779 | 1.00 |
| rs7955901  | 12779 | 1.06 |
| rs8182584  | 12779 | 1.14 |
| rs849135   | 12779 | 0.95 |
| rs7202877  | 12707 | 0.87 |

Odds ratios are per 1 unit (i.e. risk allele) of each SNP/variant.

Associations are estimated from logistic regression, adjusted for age and sex.

Models fit within each country; estimates combined across countries using random effects meta-analysis.

The rs7903146 (SNP at TCF7L2 locus) is highlighted in bold font.

ESM Table 4. Baseline characteristics of the subcohort, by GAD65 antibody status and tertile of type 1 diabetes-GRS; the EPIC-InterAct study\*.

|                          | Low/middle tertile                        |                                      | High tertile                              |                                      |
|--------------------------|-------------------------------------------|--------------------------------------|-------------------------------------------|--------------------------------------|
|                          | GAD65<br>antibody <sup>-</sup><br>n=8,295 | GAD65 antibody <sup>+</sup><br>n=149 | GAD65<br>antibody <sup>-</sup><br>n=4,231 | GAD65 antibody <sup>+</sup><br>n=104 |
| Women (%)                | 61.5                                      | 63.8                                 | 62.7                                      | 66.4                                 |
| Age (years)              | 52.2 (9.2)                                | 52.2 (9.2)                           | 52.5 (9.2)                                | 54.0 (8.9)                           |
| BMI (kg/m <sup>2</sup> ) | 26.0 (4.2)                                | 25.5 (4.2)                           | 25.9 (4.1)                                | 25.7 (3.9)                           |
| Waist-hip ratio          | 0.85 (0.09)                               | 0.85 (0.10)                          | 0.85 (0.09)                               | 0.85 (0.09)                          |
| Physical activity        |                                           |                                      |                                           |                                      |

|                      |      |      |      |      |
|----------------------|------|------|------|------|
| <i>Inactive</i>      | 23.1 | 29.3 | 22.4 | 16.5 |
| <i>Moderate</i>      | 33.3 | 36.1 | 33.6 | 37.9 |
| <i>inactive</i>      |      |      |      |      |
| <i>Moderate</i>      | 22.7 | 19.1 | 23.8 | 23.3 |
| <i>active</i>        |      |      |      |      |
| <i>Active</i>        | 21.0 | 15.6 | 20.2 | 22.3 |
| Highest school level |      |      |      |      |
| <i>None</i>          | 6.9  | 10.2 | 7.6  | 6.7  |
| <i>Primary</i>       | 32.4 | 31.3 | 32.7 | 38.5 |
| <i>Technical</i>     | 24.6 | 24.5 | 24.3 | 20.2 |
| <i>Secondary</i>     | 15.0 | 14.3 | 15.0 | 13.5 |



|                                  |           |                    |            |                    |
|----------------------------------|-----------|--------------------|------------|--------------------|
| <i>Further education</i>         | 21.1      | 19.7               | 20.5       | 21.2               |
| Smoking status                   |           |                    |            |                    |
| <i>Never</i>                     | 45.5      | 48.6               | 48.3       | 48.1               |
| <i>Former</i>                    | 27.7      | 26.7               | 25.8       | 25.0               |
| <i>Current</i>                   | 26.8      | 24.7               | 25.9       | 26.9               |
| Family history of diabetes (yes) | 18.3      | 6.8                | 19.8       | 19.6               |
| GAD65 antibody (U/ml)            | 0.0 (0,0) | 123.9 (80.4;257.9) | 0.0 (0,0)  | 156.6 (99.0;747.8) |
| Type 1 diabetes risk score       | 0.5 (0.1) | 0.5 (0.1)          | 0.7 (0.04) | 0.7 (0.04)         |

|                 |            |            |            |            |
|-----------------|------------|------------|------------|------------|
| Type 2 diabetes | 70.5 (5.7) | 70.5 (5.6) | 70.3 (5.7) | 70.2 (4.9) |
| risk score      |            |            |            |            |

---

Values presented are percentages for categorical variables, mean (SD) for continuous variables except for GAD65 antibody, which has a skewed distribution, so median (IQR) is presented.

\* Of the 15,802 members of the subcohort presented in Table 1 who all had GAD65 antibody status, 3,023 individuals did not have data for the type 1 diabetes genetic risk score, so are excluded from this table, which therefore includes N=12,779 individuals.

ESM Fig. 1. Receiver Operating Characteristic curve for GAD65 antibody levels, using the competition assay as the gold standard. Inserted panel shows GAD65 antibody levels plotted against percent inhibition.

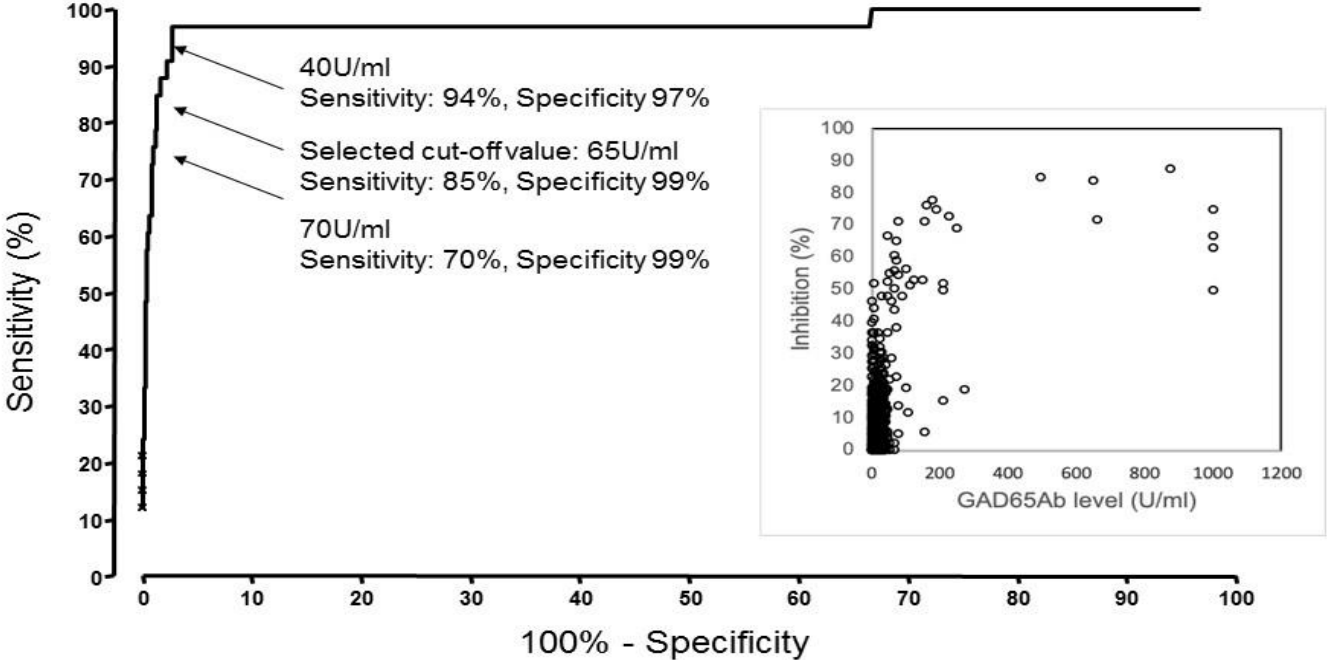

Supplement: 125_2019_5016_MOESM1_ESM.pdf [file 125_2019_5016_MOESM1_ESM.pdf]
